# Supplementary material for: Exercise-Induced Tendon and Bone Injury in Recreational Runners: A Test-Retest Reliability Study
Source: PubMed Central journal article supplement (PMC6858051; doi:10.2196/resprot.4585), 2015-10-07
Supplement: jmir_v4i4e117_app1.pdf [file jmir_v4i4e117_app1.pdf]

**Welcome!**

- **You are invited to take part in this research project if you are:**
  - **A recreational runner**
  - **Aged 18 and over**
  - **Run over 15 km per week**
- **Please read the Participant Information Form carefully as this will tell you about the research project and explain what is involved. This will help you decide if you want to continue and take part.**
- **Ask questions about anything that you don't understand or want to know more about. Before deciding whether or not to take part, you might want to talk about it with a relative, friend or healthcare worker.**

**Participation**

- **Participation in this study is entirely voluntary.**
- **You're not obliged to participate and if you do, you can withdraw at any time without penalty or prejudice.**
- **To participate, we would like you to complete this online questionnaire, providing details of your medical history, injury history and running habits.**
- **This survey should take no more than 30 minutes to complete.**
- **You are able to exit the survey and complete at a later date using the link at the top of the page.**
- **Your participation, personal details and results will be strictly confidential and only the principal researchers above will have access to this information**

**By ticking the 'I ACCEPT' option below you are telling us that you:**

- **understand what you have read;**
- **consent to take part in the research project;**
- **consent to participate in the research processes that are described;**
- **consent to the use of your personal and health information as described;**
- **understand that you are free to not answer specific items or questions in interviews or questionnaires;**
- **understand that any data or answers to questions will remain confidential with regard to your identity;**
- **certify to the best of your knowledge and belief, you have no physical or mental illness or weakness that would increase the risk of participating in this project;**
- **are participating in this project of your own free will and have not been coerced in any way to participate.**

**Do you accept to participate in this research study?\***

**I ACCEPT** the conditions above

**I DO NOT ACCEPT** the conditions above

**Further information about the project is available in the Participant Information Form**

**I wish to see more information about the project:**

Your Personal Details

1) Please enter your contact information here:

First Name\*: \_\_\_\_\_

Last Name\*: \_\_\_\_\_

Street Address: \_\_\_\_\_

City: \_\_\_\_\_

State

ACT

NSW

NT

QLD

SA

TAS

VIC

WA

Postcode: \_\_\_\_\_

Email Address\*: \_\_\_\_\_

Phone Number: \_\_\_\_\_

2) Please enter your personal details here

What year were you born?\*: \_\_\_\_\_

What month were you born?

January

February

March

April

May

June

July

August

September

October

November

December

What date of the month were you born?

1

2

3

4

5

6

7

8

9

10

11

12

13

14

15

16

17

18

19

20

21

22

23

24

25

26

27

28

29

30

31

Sex\*

Male

Female

Weight (kgs)\*: \_\_\_\_\_

Height (cm)\*: \_\_\_\_\_

I give permission, if I am eligible, to be contacted in the future for related research\*

Yes

No

I give permission, if I am eligible, to be contacted in the future to provide a saliva sample for genetic related analysis\*

Yes

No

Your Ethnic Background

3) What is your country of birth?

Australia

Other: \_\_\_\_\_

4) What is your country of citizenship?

Australia

Other: \_\_\_\_\_

5) What is the ethnic background of your biological grandparents?

**Maternal Grandmother, Maternal Grandfather, Paternal Grandmother, Paternal Grandmother**

**Answer options:**

**Caucasian European**

**Mediterranean**

**Asian**

**African**

**Polynesian**

**Indigenous Australian or TSI**

**Unknown**

**Other**

Your Running Habits

6) Which is your dominate leg\* (used for kicking a ball)? \*If you are unsure please choose according to whether you are left or right handed

Left

Right

Ambidextrous

7) How many years have you been running on a regular\* basis? \*Regular is defined as at least weekly.

|       |                          |                          |                          |                          |                          |                          |                          |                          |                          |                          |                          |
|-------|--------------------------|--------------------------|--------------------------|--------------------------|--------------------------|--------------------------|--------------------------|--------------------------|--------------------------|--------------------------|--------------------------|
|       | < 1                      | 1                        | 2                        | 3                        | 4                        | 5                        | 6                        | 7                        | 8                        | 9                        | 10 +                     |
| Years | <input type="checkbox"/> | <input type="checkbox"/> | <input type="checkbox"/> | <input type="checkbox"/> | <input type="checkbox"/> | <input type="checkbox"/> | <input type="checkbox"/> | <input type="checkbox"/> | <input type="checkbox"/> | <input type="checkbox"/> | <input type="checkbox"/> |

8) On average, how many km per week would you run?

|    |                          |                          |                          |                          |                          |                          |                          |
|----|--------------------------|--------------------------|--------------------------|--------------------------|--------------------------|--------------------------|--------------------------|
|    | <15                      | 15-20                    | 20-30                    | 30-40                    | 40-50                    | 50-60                    | 60 +                     |
| Km | <input type="checkbox"/> | <input type="checkbox"/> | <input type="checkbox"/> | <input type="checkbox"/> | <input type="checkbox"/> | <input type="checkbox"/> | <input type="checkbox"/> |

9) Do you run every day?

Yes

No

10) For an average week, please indicate how many running sessions you participate in.

|               | 1                        | 2-3                      | 4-5                      | 6+                       |
|---------------|--------------------------|--------------------------|--------------------------|--------------------------|
| sessions/week | <input type="checkbox"/> | <input type="checkbox"/> | <input type="checkbox"/> | <input type="checkbox"/> |

11) What type of terrain is the majority of your running performed on?

- Bitumen
- Cement
- Hard dirt or gravel
- Sand
- Grass
- Synthetic
- Treadmill

12) What is your current race pace in min/km?

|        | > 7                      | 6-7                      | 5-6                      | 4-5                      | < 4                      |
|--------|--------------------------|--------------------------|--------------------------|--------------------------|--------------------------|
| min/km | <input type="checkbox"/> | <input type="checkbox"/> | <input type="checkbox"/> | <input type="checkbox"/> | <input type="checkbox"/> |

13) Do you spend time stretching in association with your running session?

- Yes
- No

14) If Yes, when do you stretch?

- Before running
- After running
- Both before and after running

15) While running do you wear orthotics?

- Yes
- No

16) If Yes, which foot?

- Left foot
- Right foot
- Both feet

17) If Yes, are they custom made?

- Yes
- No

18) What proportion of your running is: (please ensure that total of all entries equals 100%)

\*minimalist means with no support or cushioning, e.g. aqua shoes, vibram five fingers (does not include Nike free, etc.)

\_\_\_\_\_with standard running shoes?

\_\_\_\_\_with minimalist running shoes?

\_\_\_\_\_barefoot?

19) In the last two years have you participated in any other sports or intentional exercise on a regular basis (for example weekly during at least one season)?

- Yes

No

20) If yes, what sports? (please list all)

---

Running Related Injuries

21) In the **last 2 years** have you had any injuries of the lower limbs, which have forced you to discontinue running for a period of 2 weeks or more?\*

Yes

No

22) If Yes, How many lower limb injuries have you been diagnosed with in the past 2 years?

1

2

3

4 +

Injury 1 - Your Most Recent Injury

Please answer the following questions in relation to **your most recent lower limb injury.**

23) You indicated that you have been diagnosed with a lower limb injury within the past 2 years  
How did this injury occur?

while running

while walking

due to a fall

during participation in another sport

other

24) Was this injury diagnosed by a professional:

|                     | Yes                      | No                       |
|---------------------|--------------------------|--------------------------|
| Doctor?             | <input type="checkbox"/> | <input type="checkbox"/> |
| Physical Therapist? | <input type="checkbox"/> | <input type="checkbox"/> |

25) Was this injury diagnosed by imaging (x-ray/ultrasound/bone scan/CT scan/MRI)?

Yes

No

26) If imaging, what type of diagnostic imaging?

x-ray

ultrasound

bone scan

CT scan

MRI

27) Do you have a copy of the report of the imaging findings?

Yes

No

28) Was the injury an Achilles tendon injury?

Yes

No

29) If Yes, which leg?

Right leg

Left leg

Both legs

30) Was the injury a bone stress injury below the knee?

Yes

No

31) If yes, which leg?

Right leg

Left leg

Both legs

32) Was your injury a different injury (other than an Achilles tendon or bone stress injury)?

Yes

No

33) What type of injury was it?

---

34) Please provide details of the signs and symptoms of the injury (tick all that apply):

bleeding

laceration

swelling

bruising

tenderness to touch

pain at rest

pain on movement

instability of joint

weakness

numbness

loss of sensation

other

35) When is/was your pain at its worst?

pain during warm up

pain during exercise

pain after exercise

pain at night

unable to exercise due to pain

36) As a result of this injury, how many weeks did you discontinue running?

|       | 1                        | 2                        | 3                        | 4                        | 5                        | 6                        | 6 +                      |
|-------|--------------------------|--------------------------|--------------------------|--------------------------|--------------------------|--------------------------|--------------------------|
| weeks | <input type="checkbox"/> | <input type="checkbox"/> | <input type="checkbox"/> | <input type="checkbox"/> | <input type="checkbox"/> | <input type="checkbox"/> | <input type="checkbox"/> |

37) How and when did your symptoms start?

sudden onset after injury

gradual onset of pain

pain during running

other

38) What type of treatment did you have in association with this injury?

Rest only

Other treatment

39) What type of treatment did you have in association with this injury?

medication

physical therapy

surgery

bracing/taping

40) If medication please provide details

---

41) Had you made any changes to your regular training program just prior to the onset of injury?  
(for example, increase in training load, change in footwear, change in terrain)

Yes

No

42) If yes, please provide details:

---

43) Had you begun or changed your participation in any new exercise other than running prior to the injury?

(for example basketball, touch football, tennis, another sport etc.)

Yes

No

44) If yes, please provide details:

---



45) Please upload any associated medical reports in relation to this injury.

You may upload a scanned report/image or a smartphone picture of the report/image (*accepted file types include png, jpg, doc, xls, docx, xlsx, pdf, txt maximum file size 1 MB*).

\_\_\_\_\_1

46) If you do not have the medical reports, do you give us permission to contact your health care provider to obtain reports relevant to this injury?

Yes

No

N/A

47) Please provide name and contact details of the medical provider who holds these records.

*We will send you a permission slip to sign and a stamped envelope addressed to this medical provider.*

*This is necessary for the release of your records to us for this survey.*

Name of medical provider:: \_\_\_\_\_

Address of medical provider:: \_\_\_\_\_

Phone contact for medical provider:: \_\_\_\_\_

#### Injury 2 - Your Second Most Recent Injury

Please answer the following questions in relation to **your second most recent lower limb injury**.  
Repeated injury questions, see questions 23 - 47

#### Re-occurring Injury

73) You have indicated that you have had more than one lower limb injury.

Was the diagnosis of the 2nd injury the same as the first injury?

Yes

No

74) If yes, was it the same foot/leg?

Yes

No

75) How many days, weeks, months passed between injuries?

Days: \_\_\_\_\_

Weeks: \_\_\_\_\_

Months: \_\_\_\_\_

76) Were the symptoms of the second injury the same, better or worse than the first injury?

Same

Better

Worse

77) Was the treatment the same for both injuries?

Yes

No

78) Was the recovery longer, shorter or similar in duration?

Longer

Shorter

Similar

79) Do you have a family history of exercise-related or other lower extremity injury?

Yes

No

80) If yes, was it:

|                        | Yes                      | No                       |
|------------------------|--------------------------|--------------------------|
| bone stress?           | <input type="checkbox"/> | <input type="checkbox"/> |
| Achilles tendinopathy? | <input type="checkbox"/> | <input type="checkbox"/> |
| another injury?        | <input type="checkbox"/> | <input type="checkbox"/> |

81) What family member did it occur in?

- check as many as relevant

Maternal Grandmother

Maternal Grandfather

Paternal Grandmother

Paternal Grandfather

Mother

Father

Brother

Sister

Maternal Aunt

Paternal Aunt

Maternal Uncle

Paternal Uncle

Maternal 1st Cousin

Paternal 1st Cousin

Injury 3 - Your Third Most Recent Injury

Please answer the following questions in relation to **your third most recent lower limb injury.**

Repeated injury questions, see questions 23 - 47

**Injury 4 - Your Fourth Most Recent Injury**

Please answer the following questions in relation to **your fourth most recent lower limb injury.**

Repeated injury questions, see questions 23 - 47

**General Health Questions**

132) Have you ever smoked cigarettes?

Yes

No

133) If Yes, at what age did you start smoking?

\_\_\_\_\_

134) Do you currently smoke?

Yes

No

135) If Yes, how many cigarettes per day on average?

\_\_\_\_\_

136) If No, at what age did you quit?

\_\_\_\_\_

137) When you were smoking, on average how many cigarettes per day would you smoke over the years until you quit?

\_\_\_\_\_

138) Do you ever consume alcoholic drinks?

Yes

No

139) If yes, approximately how many standard drinks would you consume per week? Examples of standard drinks include 100ml of wine, a bottle of mid-strength beer, a 285ml glass(midi) of full strength beer or a 30ml nip of spirits.

|        | <b>1-3</b>               | <b>4-6</b>               | <b>7-10</b>              | <b>10 +</b>              |
|--------|--------------------------|--------------------------|--------------------------|--------------------------|
| drinks | <input type="checkbox"/> | <input type="checkbox"/> | <input type="checkbox"/> | <input type="checkbox"/> |

**General Health Questions**

140) Have you ever been diagnosed with any of the following conditions/disorders?

|                       | <b>Yes</b>               | <b>No</b>                |
|-----------------------|--------------------------|--------------------------|
| any type of cancer    | <input type="checkbox"/> | <input type="checkbox"/> |
| chronic renal failure | <input type="checkbox"/> | <input type="checkbox"/> |
| rheumatoid arthritis  | <input type="checkbox"/> | <input type="checkbox"/> |

|                          |     |     |
|--------------------------|-----|-----|
| osteoarthritis           | ( ) | ( ) |
| osteoporosis             | ( ) | ( ) |
| diabetes                 | ( ) | ( ) |
| cystic fibrosis          | ( ) | ( ) |
| cerebral palsy           | ( ) | ( ) |
| cardiac conditions       | ( ) | ( ) |
| high blood pressure      | ( ) | ( ) |
| anaemia                  | ( ) | ( ) |
| skin diseases            | ( ) | ( ) |
| thyroid disease          | ( ) | ( ) |
| gastrointestinal disease | ( ) | ( ) |
| depression               | ( ) | ( ) |
| insomnia                 | ( ) | ( ) |
| respiratory conditions   | ( ) | ( ) |
| neurological conditions  | ( ) | ( ) |
| other                    | ( ) | ( ) |

141) Have you ever had hip, knee or ankle surgery?

( ) Yes

( ) No

142) If yes,

|       | Yes | No |
|-------|-----|----|
| Hip   |     |    |
| Knee  |     |    |
| Ankle |     |    |

143) Have you ever had a fracture of any bone?

( ) Yes

( ) No

144) If yes:

Where was the fracture?: \_\_\_\_\_

When did it occur?: \_\_\_\_\_

What treatment did you receive?: \_\_\_\_\_

145) Do you have a family history of osteoporosis?

( ) Yes

( ) No

( ) Unsure

146) To your knowledge, have you ever been treated using quinolone antibiotics (for example ciprofloxacin, norfloxacin)?

( ) Yes

No

Unsure

147) If yes, were you treated using these antibiotics within the 6 months prior to your injury?

Yes

No

Unsure

148) To your knowledge, have you ever been treated using anti-seizure or epilepsy medications (for example clonazepam, gabapentin, lamotrigine, sodium valproate)?

Yes

No

Unsure

149) To your knowledge, have you ever been treated using corticosteroid medication (for example cortisone injection, prednisone tablets, prednisolone tablets, flixotide inhaler, pulmicort inhaler, QVAR inhaler, seretide accuhaler, symbicort turbuhaler, steroid cream)?

Yes

No

Unsure

150) If yes, how was this drug administered?

Injection

Topical Cream

Tablet

Inhaler

151) Which type of inhaler?

---

#### General Health Questions

152) To your knowledge, have you ever been treated using calcium tablets as prescribed by a medical doctor or taken it without a prescription?

Yes

No

Unsure

153) Do you take calcium tablets on a regular basis?

Yes

No

154) If yes, please provide details of dose and brand:

Dose: \_\_\_\_\_

Brand: \_\_\_\_\_

155) To your knowledge, have you ever been treated using vitamin D supplementation as prescribed by a medical doctor or taken it without prescription?

Yes

No

Unsure

156) Do you take vitamin D supplementation on a regular basis?

Yes

No

157) If yes, please provide details of dose and brand:

Dose: \_\_\_\_\_

Brand: \_\_\_\_\_

158) To your knowledge, have you ever

|                                                                                                          | <b>Yes</b>               | <b>No</b>                | <b>Unsure</b>            |
|----------------------------------------------------------------------------------------------------------|--------------------------|--------------------------|--------------------------|
| been treated using bisphosphonates (for example actonel, Didrocal, alendronate sodium, zoledronic acid)? | <input type="checkbox"/> | <input type="checkbox"/> | <input type="checkbox"/> |
| undergone chemotherapy?                                                                                  | <input type="checkbox"/> | <input type="checkbox"/> | <input type="checkbox"/> |
| undergone a bone marrow or organ transplant?                                                             | <input type="checkbox"/> | <input type="checkbox"/> | <input type="checkbox"/> |

159) Are you regularly taking, or have you ever taken, any other regular medication as prescribed by a medical doctor?

Yes

No

160) If yes, please list medications

\_\_\_\_\_

161) Are you regularly taking, or in the past have you regularly taken any other over-the-counter medications, dietary supplements or sports supplements?

Yes

No

162) If yes, please list any other medications/supplements

B-alanine

B-Vitamins

- Creatine
- Fish Oil
- Glucosamine
- Iron
- Probiotics
- Protein Powder
- Vitamin C
- Zinc
- Other: \_\_\_\_\_

Dietary Habits

163) Would you say that food dominates your life?

Yes

No

164) Do you:

|                                                                                      | Yes                      | No                       |
|--------------------------------------------------------------------------------------|--------------------------|--------------------------|
| Currently suffer with or have you ever suffered in the past with an eating disorder? | <input type="checkbox"/> | <input type="checkbox"/> |
| Make yourself sick because you feel uncomfortably full?                              | <input type="checkbox"/> | <input type="checkbox"/> |
| Worry you have lost control over how much you eat?                                   | <input type="checkbox"/> | <input type="checkbox"/> |
| Believe yourself to be fat when others say you are too thin?                         | <input type="checkbox"/> | <input type="checkbox"/> |

165) Have you recently lost more than 6kgs in a 3 month period?

Yes

No

166) Have you undergone any significant (greater than 5 kg) weight gain or loss in the past 2 years?

Yes

No

167) If Yes, please indicate the amount of weight gained/lost

weight gain (kgs): \_\_\_\_\_

weight lost (kgs): \_\_\_\_\_

reason (if any known): \_\_\_\_\_

168) Do you follow any of the diets below:

|                       | Yes | No  |
|-----------------------|-----|-----|
| Vegetarian?           | ( ) | ( ) |
| Lacto-ovo vegetarian? | ( ) | ( ) |
| Pesco-vegetarian?     | ( ) | ( ) |
| Vegan?                | ( ) | ( ) |
| Paleolithic/Paleo?    | ( ) | ( ) |
| Low carb/High Fat?    | ( ) | ( ) |

169) Do you follow a gluten free diet?

( ) Yes

( ) No

170) If yes, please provide the reason why you follow this diet

( ) Coeliac disease

( ) Medically diagnosed gluten intolerance

( ) Undiagnosed gluten intolerance

( ) Irritable bowel syndrome

( ) Other

171) Do you have any food allergies or avoidances?

( ) Yes

( ) No

172) If yes,

|   | Food type | Reason for avoidance |
|---|-----------|----------------------|
| 1 | _____     | _____                |
| 2 | _____     | _____                |
| 3 | _____     | _____                |
| 4 | _____     | _____                |

Female Health Questions

173) Are you currently taking or have you ever taken the contraceptive pill?

( ) Yes

( ) No

174) If yes, how long have you or did you take the contraceptive pill?

|                | < 1 year | 1-2 years | 3-5 years | 5 + years |
|----------------|----------|-----------|-----------|-----------|
| Length of time | ( )      | ( )       | ( )       | ( )       |

175) What was the name of the contraceptive pill you were taking?

\_\_\_\_\_



176) Do you have any children?

Yes

No

177) Please indicate the year of birth for each child

Child 1: \_\_\_\_\_

Child 2: \_\_\_\_\_

Child 3: \_\_\_\_\_

Child 4: \_\_\_\_\_

Child 5: \_\_\_\_\_

178) What is the regular length of your menstrual cycle?

|              | <b>I don't have a period</b> | <b>Irregular</b>         | <b>&lt; 26 days</b>      | <b>27 - 31 days</b>      | <b>&gt; 31 days</b>      |
|--------------|------------------------------|--------------------------|--------------------------|--------------------------|--------------------------|
| Cycle length | <input type="checkbox"/>     | <input type="checkbox"/> | <input type="checkbox"/> | <input type="checkbox"/> | <input type="checkbox"/> |

179) Please provide a reason why you don't have a period:

\_\_\_\_\_

180) Have you gone through menopause?

Yes

No

181) If yes, at what age did you go through menopause?

\_\_\_\_\_

182) Was the menopause:

Natural

Surgical

183) Have you experienced amenorrhea (absence of menstrual periods) or oligomenorrhea (infrequent or irregular menstruation) or menorrhagia (excessive menstruation)?

Yes

No

184) What age did you commence your menstrual period?

|     | <b>Early than 12 years old</b> | <b>12 years old</b>      | <b>13 years old</b>      | <b>14 years old</b>      | <b>15 years old</b>      | <b>Later than 15 years old</b> |
|-----|--------------------------------|--------------------------|--------------------------|--------------------------|--------------------------|--------------------------------|
| Age | <input type="checkbox"/>       | <input type="checkbox"/> | <input type="checkbox"/> | <input type="checkbox"/> | <input type="checkbox"/> | <input type="checkbox"/>       |

Complete

**Thank You for Participating!**

*If you have indicated and are eligible, you may be contacted in the future to provide a saliva*

*sample for analysis.*
